CORRECTION

# Correction: Simple Messages Help Set the Record Straight about Scientific Agreement on Human-Caused Climate Change: The Results of Two Experiments

The *PLOS ONE* Staff

## Notice of Republication

This article was republished on June 23, 2015, to replace copyrighted or confidential material. Please download this article again to view the correct version.

## Reference

1. Myers TA, Maibach E, Peters E, Leiserowitz A (2015) Simple Messages Help Set the Record Straight about Scientific Agreement on Human-Caused Climate Change: The Results of Two Experiments. *PLoS ONE* 10(3): e0120985. doi:[10.1371/journal.pone.0120985](https://doi.org/10.1371/journal.pone.0120985) PMID: [25812121](https://pubmed.ncbi.nlm.nih.gov/25812121/)

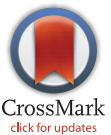

## OPEN ACCESS

**Citation:** The *PLOS ONE* Staff (2015) Correction: Simple Messages Help Set the Record Straight about Scientific Agreement on Human-Caused Climate Change: The Results of Two Experiments. *PLoS ONE* 10(7): e0133103. doi:[10.1371/journal.pone.0133103](https://doi.org/10.1371/journal.pone.0133103)

**Published:** July 15, 2015

**Copyright:** © 2015 The PLOS ONE Staff. This is an open access article distributed under the terms of the [Creative Commons Attribution License](https://creativecommons.org/licenses/by/4.0/), which permits unrestricted use, distribution, and reproduction in any medium, provided the original author and source are credited.
